# Supplementary material for: HDO production from [2H7]glucose Quantitatively Identifies Warburg Metabolism
Source: PubMed Central journal article supplement (PMC7264272; doi:10.1038/s41598-020-65839-8), 2020-06-01
Supplement: 41598_2020_65839_MOESM1_ESM.pdf [file 41598_2020_65839_MOESM1_ESM.pdf]

## **HDO production from [<sup>2</sup>H<sub>7</sub>]glucose Quantitatively Identifies Warburg Metabolism**

Rohit Mahar<sup>1</sup>, Patrick L. Donabedian<sup>1</sup>, Matthew E. Merritt<sup>1</sup>

<sup>1</sup>Department of Biochemistry and Molecular Biology, College of Medicine, University of Florida, Gainesville, FL, USA, 32610.

Correspondence and requests for materials should be addressed to M.E.M.  
(email:matthewmerritt@ufl.edu)

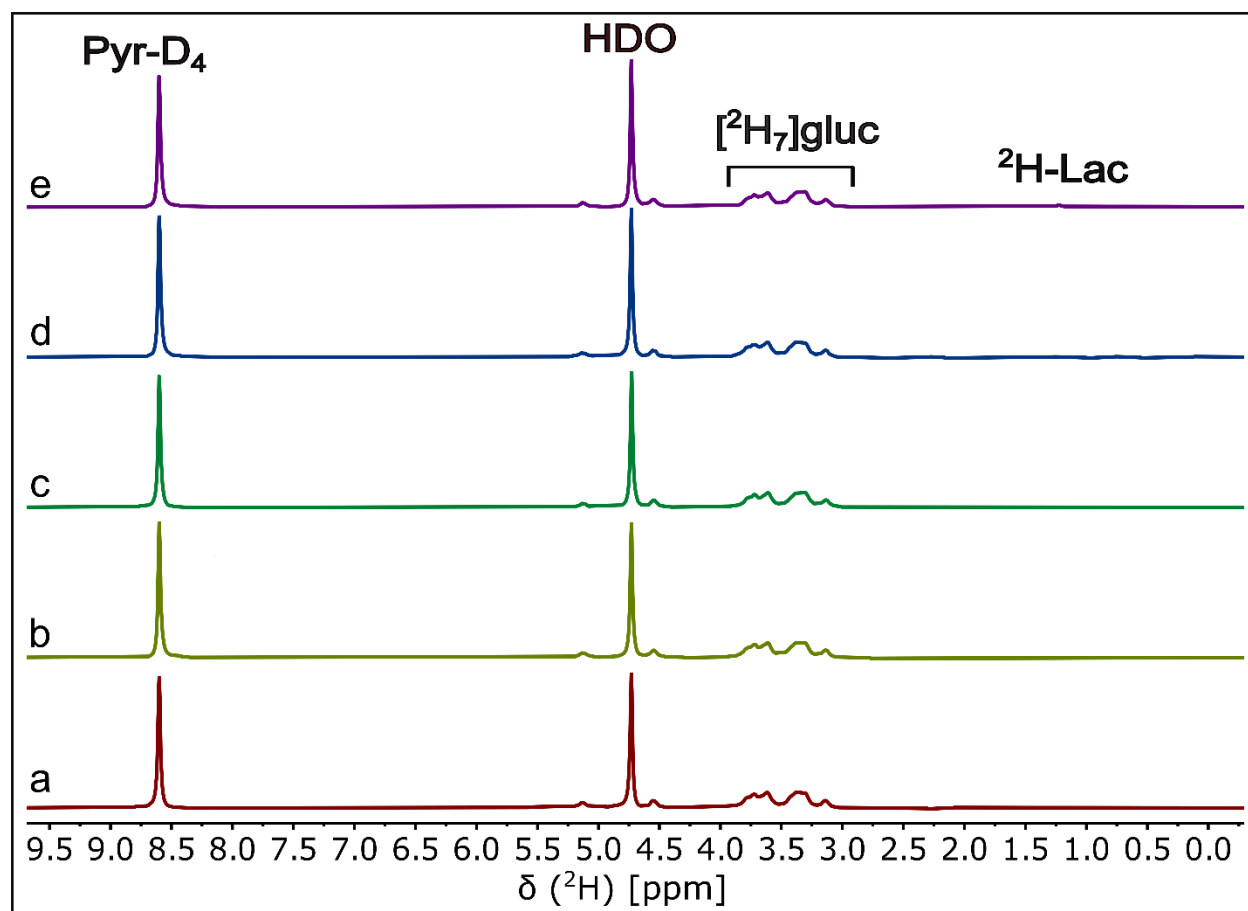

**Supplementary Figure S1.  $^2\text{H}$ -NMR spectra of the AML12 cell media at different time points:** Stacked plot of the  $^1\text{H}$ -decoupled  $^2\text{H}$ -NMR spectra of the AML12 cell line incubated with 5.5 mM  $[^2\text{H}_7]\text{glucose}$ . Cell media withdrawn at (a) 0 min, (b) 20 min, (c) 1 h, (d) 2 h and (e) 5 h time points from cultures of AML12 cancer cells. Labeling on each peak in the (e) spectrum showing the resonances arise from the pyrazine- $\text{D}_4$ , HDO, residual  $[^2\text{H}_7]\text{glucose}$ , and  $^2\text{H}$ -lactate.

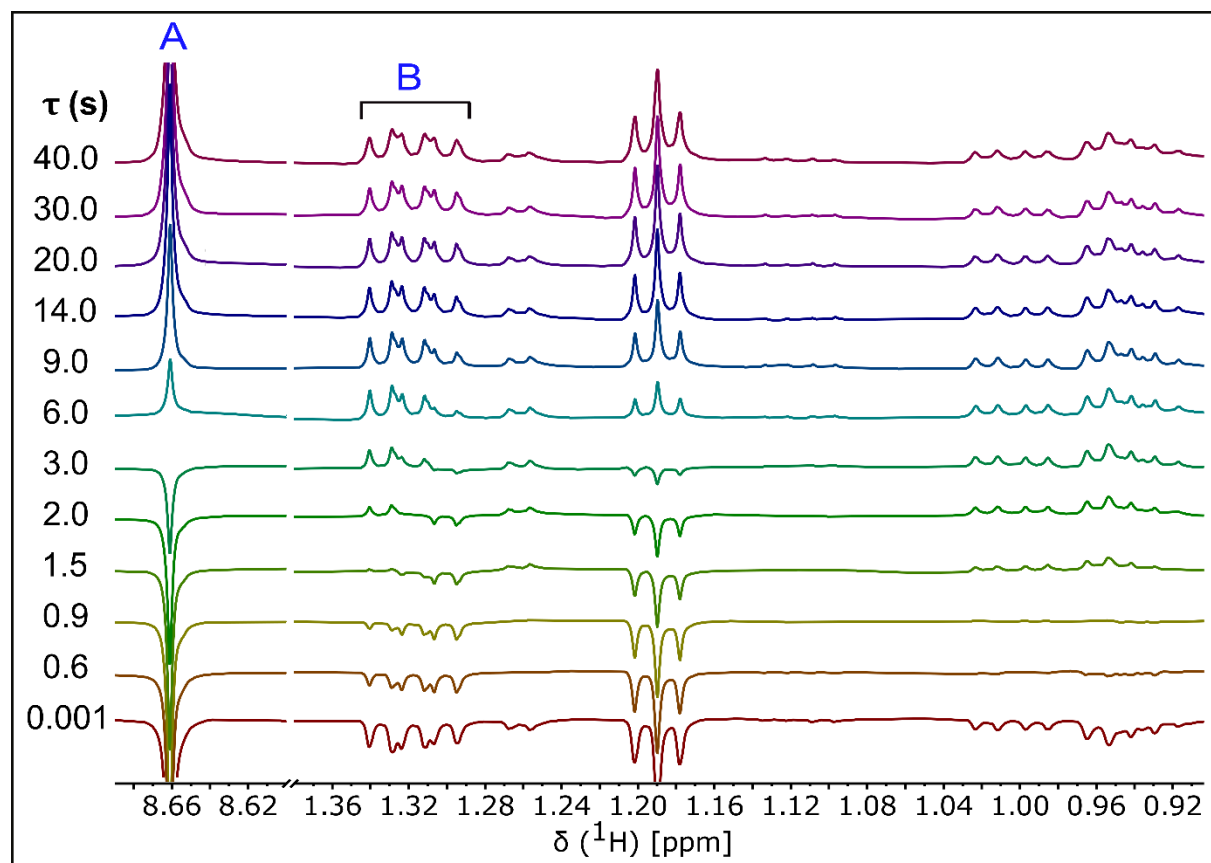

**Supplementary Figure S2. Inversion recovery spectra of pyrazine and lactate isotopomers:** Stacked plot of the  $T_1$ -inversion recovery  $^1\text{H}$ -NMR spectra recorded with  $^2\text{H}$ -decoupling during acquisition. Inversion recovery delays ( $\tau$ ) used to acquire the FIDs have been indicated in the front of respective spectrum. A and B marks represent the pyrazine and lactate isotopomers peak respectively.

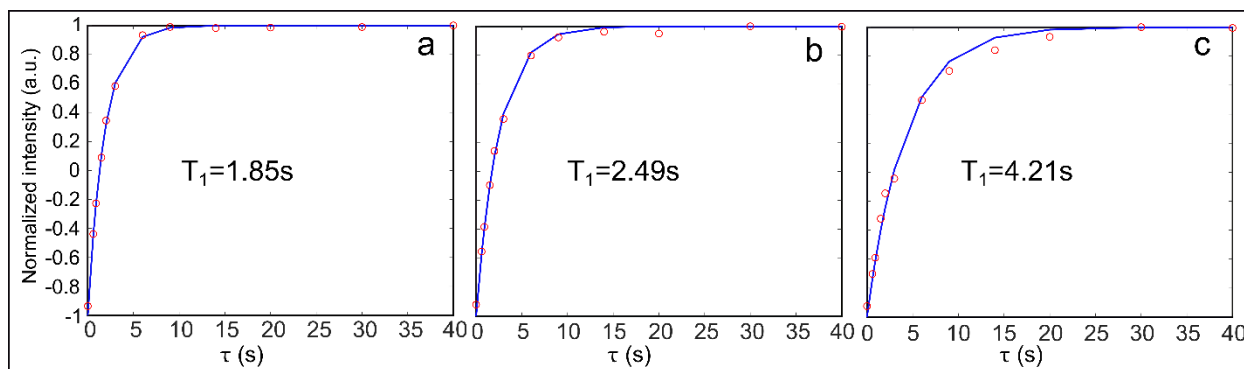

**Supplementary Figure S3. Proton  $T_1$  relaxation times of the lactate isotopomers:** Longitudinal relaxation time ( $T_1$ ) fitting curves and calculated  $T_1$  relaxation times for (a) lac-CH<sub>3</sub>, (b) lac-CH<sub>2</sub>D and (c) lac-CHD<sub>2</sub> isotopomers.  $T_1$  relaxation times were calculated using the normalized  $T_1$ -inversion recovery <sup>1</sup>H-NMR data and the standard inversion recovery equation.

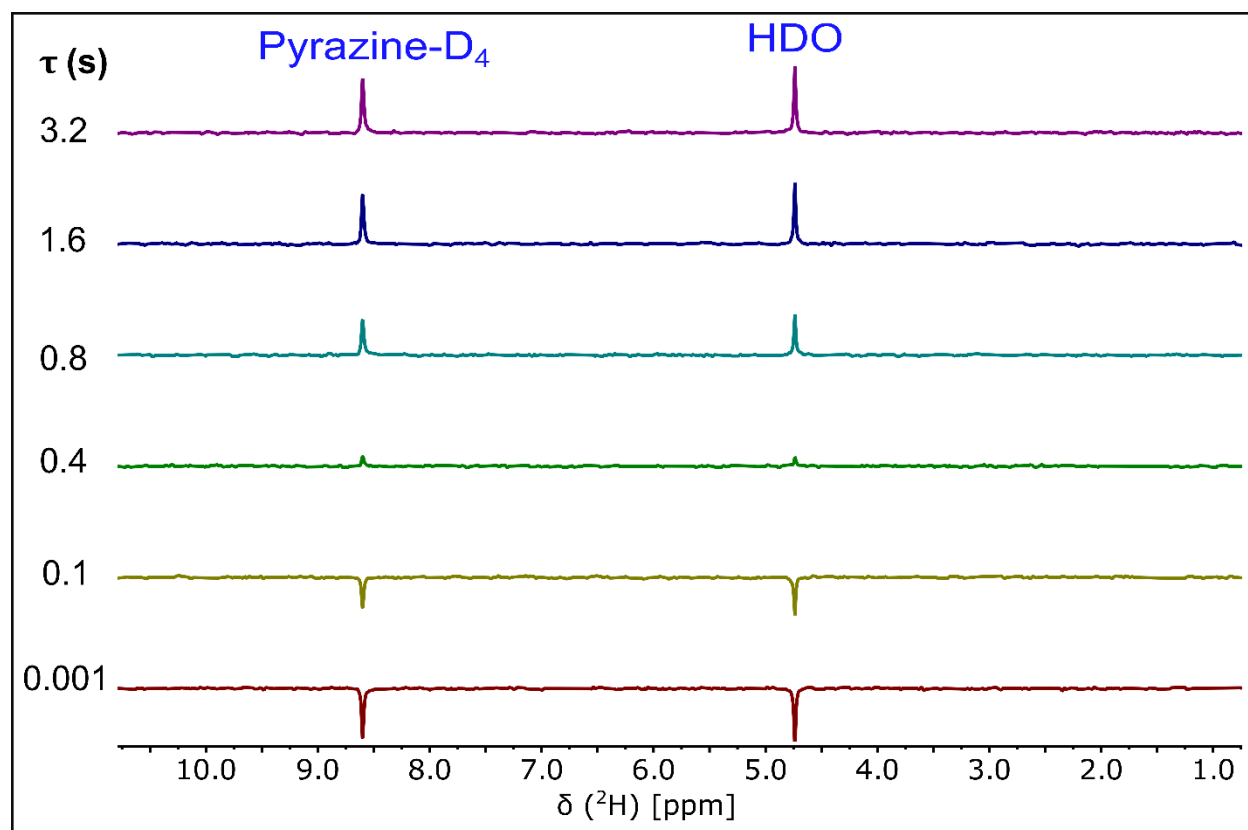

**Supplementary Figure S4. Deuterium  $T_1$ -inversion recovery spectra:** Stacked plot of the  $T_1$ -inversion recovery  $^2\text{H}$ -NMR spectra, showing the pyrazine- $\text{D}_4$  and HDO resonances. Inversion recovery delays ( $\tau$ ) used to acquire the FIDs have been indicated in the front of respective spectrum.  $T_1$  relaxation times were calculated for HDO and pyrazine- $\text{D}_4$  and found to be 0.49s and 0.45s respectively.

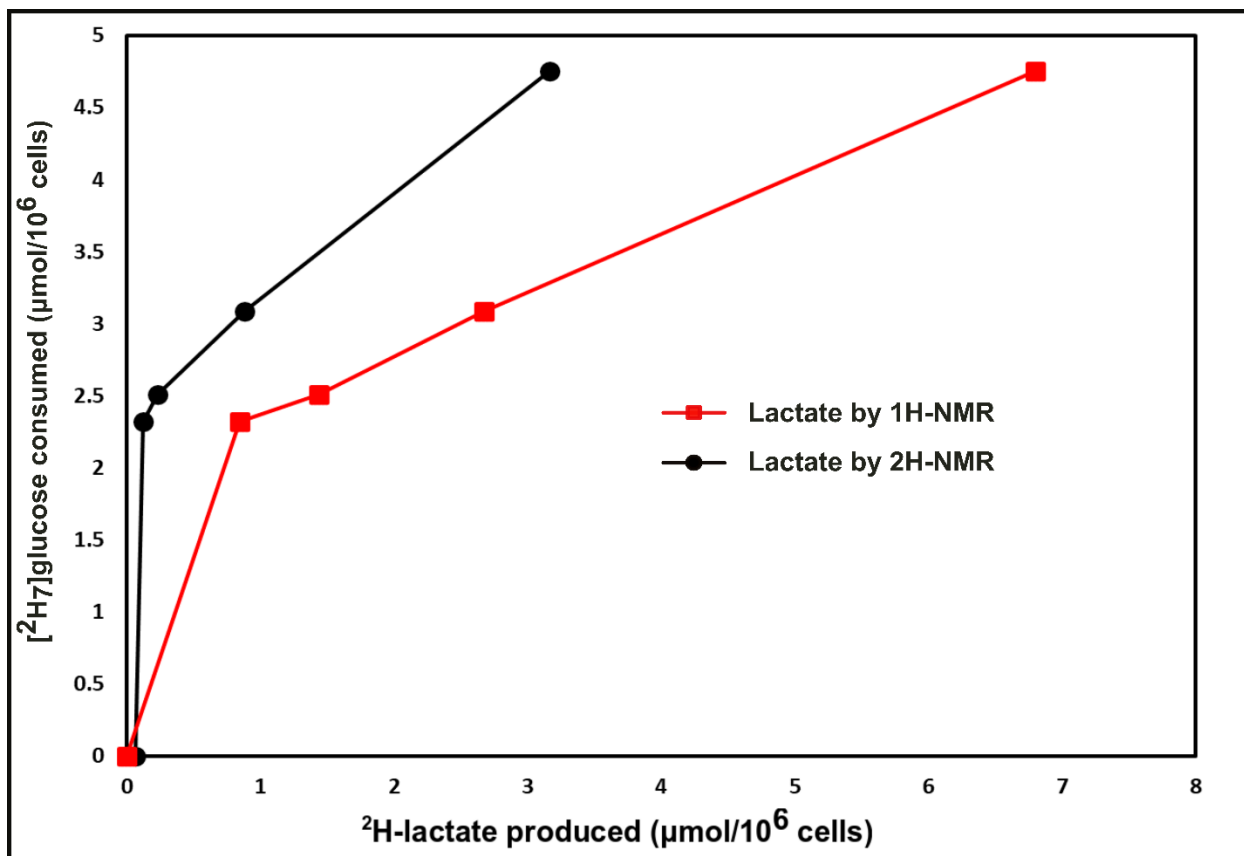

**Supplementary Figure S5. Lactate production measured by  $^1\text{H}$  and  $^2\text{H}$  NMR:** Plot of the correlation between  $[^2\text{H}_7]\text{glucose}$  consumption and lactate production from HUH-7 cells. Red circles and black squares showed the lactate concentration, measured by  $^1\text{H}$  and  $^2\text{H}$  NMR, respectively. The  $^1\text{H}$ -NMR has very high sensitivity to measure the lactate isotopomers produced from  $[^2\text{H}_7]\text{glucose}$ .

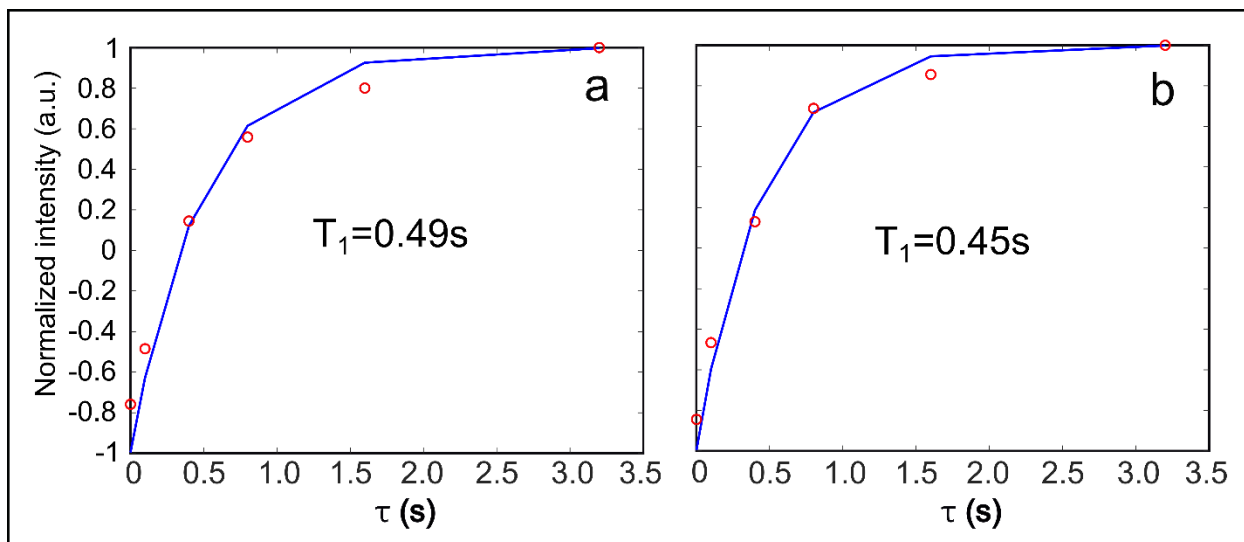

**Supplementary Figure S6. Deuterium  $T_1$  relaxation times of the HDO and pyrazine- $D_4$  isotopomers:** Longitudinal relaxation time ( $T_1$ ) fitting curves and calculated  $T_1$  relaxation times for (a) HDO and (b) pyrazine- $D_4$ .  $T_1$  relaxation times were calculated using the normalized inversion recovery  $^2\text{H-NMR}$  data and the standard inversion recovery equation.
